1 Paper for Journal of Experimental Biology

2

3 **Colouration principles of nymphaline butterflies – thin films, melanin,**  
4 **ommochromes and wing scale stacking**

5 Doekele G. Stavenga<sup>1,\*</sup>, Hein L. Leertouwer<sup>1</sup>, Bodo D. Wilts<sup>1,2</sup>

6 <sup>1</sup>Computational Physics, Zernike Institute for Advanced Materials, University of Groningen,  
7 NL-9747 AG Groningen, the Netherlands

8 <sup>2</sup>Present address: Cavendish Laboratory, Department of Physics, University of Cambridge,  
9 Cambridge CB3 0HE, United Kingdom

10 \*Corresponding author: [d.g.stavenga@rug.nl](mailto:d.g.stavenga@rug.nl)

11

12 **Summary**

13 The colouration of the common butterflies *Aglais urticae* (Small Tortoiseshell), *Aglais io*  
14 (Peacock) and *Vanessa atalanta* (Red Admiral), belonging to the butterfly subfamily  
15 Nymphalinae, is due to the species-specific patterning of differently coloured scales on their  
16 wings. We investigated the scales' structural and pigmentary properties by applying scanning  
17 electron microscopy, (micro)spectrophotometry, and imaging scatterometry. The anatomy of  
18 the wing scales appears to be basically identical, with an approximately flat lower lamina  
19 connected by trabeculae to a highly structured upper lamina, which consists of an array of  
20 longitudinal, parallel ridges and transversal crossribs. Isolated scales observed at the abwing  
21 (upper) side are blue, yellow, orange, red, brown, or black, depending on their pigmentation.  
22 The yellow, orange and red scales contain various amounts of 3-OH-kynurenine and  
23 ommochrome pigment, black scales contain a high density of melanin, and blue scales have a  
24 minor amount of melanin pigment. Observing the scales from their adwing (lower) side  
25 always revealed a structural colour, which is blue in the case of blue, red and black scales, but  
26 orange for orange scales. The structural colours are created by the lower lamina, which acts as  
27 an optical thin-film. Its reflectance spectrum, crucially determined by the lamina thickness,  
28 appears to be well-tuned to the scales' pigmentary spectrum. The colours observed locally on  
29 the wing are also due to the degree of scale stacking. Thin films, tuned pigments and  
30 combinations of stacked scales together determine the wing colouration of nymphaline  
31 butterflies.

32

33 **Keywords:** xanthommatin □ 3-OH-kynurenine □ structural colouration □ pigmentary  
34 colouration □ scattering

35

## 36 **Introduction**

37 Butterflies are universally considered attractive because of their bright colouration patterns.  
38 The colour patterns are due to a tapestry of numerous small scales, each with a distinct colour,  
39 which together create the species-characteristic appearance as in pointillist paintings (Nijhout,  
40 1991). The scale colours can have a structural and/or a pigmentary origin, depending on the  
41 scale anatomy and its pigmentation (Kinoshita and Yoshioka, 2005). Striking structural  
42 colours are widespread among butterflies, with *Morpho* butterflies as the most famous  
43 examples, but also many lycaenids and papilionids feature iridescent colours due to intricate  
44 photonic systems (Srinivasarao, 1999; Kinoshita et al., 2008; Michielsen et al., 2010).

45 The scale elements creating structural colours can be almost perfect thin films, as in  
46 the papilionid butterfly *Graphium sarpedon* (Stavenga et al., 2012), (perforated) multilayers  
47 in the scale lumen of lycaenids (Wilts et al., 2009), multilayers in the scale ridges, as in  
48 *Morpho* butterflies, many pierids and nymphalids (Ghiradella et al., 1972; Ghiradella, 1989;  
49 Vukusic et al., 1999; Kinoshita et al., 2002), or complex three-dimensional photonic crystals,  
50 as in some lycaenids (Ghiradella, 1998; Michielsen and Stavenga, 2008; Michielsen et al.,  
51 2010) and papilionids (Saranathan et al., 2010; Wilts et al., 2012a).

52 The pigments contributing to colouration vary among the butterfly families. The black  
53 scales of all butterfly families contain melanin. White scales may be presumed to be  
54 unpigmented, but the white scales of pierids contain leucopterin, a purely UV-absorbing  
55 pigment, whereas the yellow, orange and red scales of pierids contain the violet- and blue-  
56 absorbing xanthopterin and/or erythropterin (Kayser, 1985; Wijnen et al., 2007). The  
57 pigments of the coloured scales of papilionids contain another pigment class, the  
58 papiliochromes, derived from the precursor kynurenine (Umebachi, 1985; Wilts et al., 2012b),  
59 which is also used by nymphalids to produce 3-hydroxy-kynurenine and various  
60 ommochromes, pigments that predominantly determine their wing colouration (Nijhout, 1997;  
61 Takeuchi et al., 2005; Nijhout, 2010). In fewer cases, bile pigments and carotenoids colour  
62 butterfly wings (Barbier, 1981; Stavenga et al., 2010). The pterin pigments of pierids are  
63 concentrated in strongly scattering granules (Yagi, 1954; Ghiradella et al., 1972; Stavenga et  
64 al., 2004), but the other pigment classes occur diffused throughout the scale components.

65 The wing scales of most nymphalids are essentially flattened sacs; in each the lower  
66 lamina (the adwing side, i.e. facing the wing substrate) is connected by a series of pillars (the

67 trabeculae) to the upper lamina, which consists of the ridges and crossribs (Ghiradella, 1998;  
68 Ghiradella, 2010). Light reflected by these components together with the wavelength-  
69 selective absorption by the scale's pigment determines the scale colour. Consequently,  
70 measured reflectance spectra are somewhat complimentary to the pigment's absorbance  
71 spectra. Absorbance spectra of various ommochromes present in the wing scales of the  
72 Buckeye, *Precis coenia*, which belongs to the nymphalid subfamily Nymphalinae, have been  
73 determined by extraction of the pigments with methanol (Nijhout, 1997). The synthesis of  
74 ommochromes and expression patterns in nymphalid wing scales has been studied in  
75 considerable detail in other nymphaline butterflies, i.e., the Small Tortoiseshell (*Aglais*  
76 *urtica*), the Map butterfly (*Araschnia levana*; Koch, 1991), the Painted Lady (*Vanessa cardui*;  
77 Reed and Nagy, 2005), and also in a heliconine, the Red Postman (*Heliconius erato*; Reed et  
78 al., 2008).

79         Structural and pigmentary coloration mechanisms are often encountered  
80 simultaneously. For instance, the wings of butterflies of the *Papilio nireus* group have  
81 conspicuous black margins surrounding blue-green bands. In the latter areas, the lower lamina  
82 of the scales acts as a thin film, reflecting broad-band blue light. The thick upper lamina  
83 contains the violet-absorbing pigment papiliochrome II, and thus acts as an optical band-filter,  
84 limiting the reflected light to the blue-green wavelength range (Trzeciak et al., 2012; Wilts et  
85 al., 2012b). In the opposite way, in several pierid butterflies, in the short-wavelength range,  
86 where the wing pigments strongly absorb, ridge interference reflectors contribute to the  
87 reflectance (Rutowski et al., 2005; Stavenga et al., 2006). In many cases melanin enhances the  
88 saturation of the colour signal. For example, in *Morpho* wing scales, the melanin deposited  
89 below the multilayered ridges effectively absorbs transmitted light, which potentially could be  
90 scattered back by the wing or other scale structures and thus result in a desaturating  
91 background signal (Kinoshita et al., 2008).

92         Here we study the wing colouration of a few common nymphaline butterfly species.  
93 We specifically investigate the optical properties and pigmentation that determine the colours  
94 of the various individual wing scales. We demonstrate that the thin film properties of the  
95 lower lamina are a dominant factor in determining the scale's colour. The reflectance  
96 spectrum of the lower lamina appears to be well-tuned to the scale's pigmentation. We  
97 furthermore find that the wing colouration depends on the stacking of neighbouring scales.

98

## 99 **Results**

### 100 *Wing colouration and reflectance spectra*

101 The wings of the Small Tortoiseshell, Peacock, and Red Admiral, all nymphaline butterflies,  
102 have strikingly colourful dorsal (upper) sides (Fig. 1A-C). The ventral (lower) sides of the  
103 wings have instead a very inconspicuous dull brown-black colour, except for the Red Admiral  
104 where the ventral forewings feature some colouration (Fig. 1D). To unravel the various  
105 optical mechanisms underlying the different colours, we first measured the local spectral  
106 reflectance with a bifurcated probe. The reflectance spectra of the yellow to red-brown wing  
107 areas show characteristic long-pass features, i.e. a low reflectance at short wavelengths and a  
108 high reflectance in the long-wavelength range (Fig. 1E-H, # 2, 3, 5, 6, 9, 13); the number near  
109 the reflectance spectra corresponds with the number of the location where the spectra were  
110 measured (indicated in Fig. 1A-D). The reflectance spectra measured from blue areas reveal a  
111 distinct peak around 420 nm and a valley near 620 nm (Fig. 1E-H, # 4, 7, 11, 15).  
112 Interestingly, reflectance spectra obtained from white wing areas have a similar biphasic  
113 shape riding on a distinct plateau (e.g. Fig. 1G,H, #10, 14). The black areas, not surprisingly,  
114 have a very low reflectance (Fig. 1F-H, #8, 12, 16).

115

#### 116 *Scale anatomy*

117 The wing colours reside in the tapestry of wing scales, and therefore we investigated single  
118 scales taken from the differently coloured wing areas. A red scale of a Red Admiral and a  
119 black scale of a Peacock, immersed in a refractive index fluid (Fig. 2A,B), both show  
120 numerous longitudinal lines. These are due to the ridges, which are prominently revealed by  
121 scanning electron microscopy (Fig. 2C).

122 All nymphaline scale types appeared to have essentially the same basic *Bauplan*, as  
123 shown in the diagram of Figure 2D (Ghiradella, 1998; Ghiradella, 2010). The abwing side of  
124 the scales consists of parallel rows of ridges (Fig. 2D, r) with slopes featuring microribs (Fig.  
125 2D, m). Some of the microribs are continuous with crossribs (Fig. 2D, c), which connect  
126 adjacent ridges, thus marking open windows (Fig. 2C,D). The crossribs are connected by  
127 trabeculae (Fig. 2D, t) with the approximately flat lower lamina.

128

#### 129 *Pigments of nymphaline wing scales*

130 The scales of Fig. 2A,B evidently contain strongly different absorbing pigments. To identify  
131 the pigments in the wing scales of the investigated nymphalines, we isolated scales from the  
132 differently coloured wing areas of the three nymphalines of Figure 1. We immersed the scales  
133 in immersion oil, so as to reduce light scattering and reflection that unavoidably occur at  
134 boundaries between media with different refractive index values, and we then measured the

135 scale transmittance with a microspectrophotometer. The absorbance spectra thus obtained  
136 from the individual yellow, red and blue scales were rather varied (Fig. 3A-C). The  
137 absorbance of the orange and red scales peaked at 480-500 nm, and the absorbance of the  
138 yellow scales peaked in the ultraviolet, at around 380 nm, but often had a side band near 500  
139 nm (Fig. 3B, C).

140 The absorbance spectra of the orange and red scales are very reminiscent of the  
141 ommochromes, identified in related nymphalid butterflies (Nijhout, 1997; Reed and Nagy,  
142 2005). Figure 3D shows the absorbance spectrum of xanthommatin extracted from wing  
143 scales of the Buckeye (Nijhout, 1997), together with the spectrum of its precursor, 3-OH-  
144 kynurenine (extracted from yellow scales of *Heliconius melpomene* with methanol,  
145 unpublished; see also Reed and Nagy, 2005). The spectra of the yellow scales (Fig. 3A-C)  
146 indicate that these scales contain mainly 3-OH-kynurenine with various traces of  
147 xanthommatin. The absorbance of the blue scales, taken from the eyespot of the Peacock, was  
148 minor, decreasing monotonically with wavelength, indicating a rather small amount of  
149 melanin pigment (Fig. 3B). The absorbance spectra of the black scales (not shown), had a  
150 similar shape, i.e. monotonically decreasing with increasing wavelength, but the amplitude  
151 was quite variable, frequently exceeding an absorbance value of 1. Traces of ommochromes  
152 appeared to be often present, but the main component was clearly melanin.

153 Most of the absorbance spectra of Figure 3, when compared with the reflectance  
154 spectra of Figure 1, seem to confirm the common view that pigments determine the scale  
155 colour. For instance, the yellow, orange and red scales have a low reflectance in the  
156 wavelength range where the 3-OH-kynurenine and xanthommatin pigments strongly absorb.  
157 Melanin absorbs throughout the whole wavelength range and thus with sufficient density will  
158 cause low-reflecting, black scales. The blue scales, containing a small amount of melanin,  
159 have reflectance spectra that cannot be straightforwardly reconciled with the absorbance  
160 spectrum of its pigment, however. The conclusion therefore must be that the blue colour of  
161 these scales has a structural origin.

162

### 163 *Thin films*

164 The shape of the reflectance spectra of the blue wing areas (Fig. 1) suggests that the lower  
165 lamina of the local scales acts as an optical, dielectric thin film. We therefore calculated the  
166 reflectance spectrum of a thin film with various thicknesses using the classical Airy formula  
167 for normal light incidence (Yeh, 2005; Stavenga et al., 2012). For the refractive index of the  
168 thin film, we used the dispersion data determined for the glass wing scales of the papilionid

169 butterfly *Graphium sarpedon* (Leertouwer et al., 2011). Those scales consist of two collapsed  
170 layers, each with a thickness of about 200 nm (Stavenga et al., 2010). The same thickness  
171 value was concluded for the lower lamina of the green scales of *Papilio nireus* butterflies  
172 (Trzeciak et al., 2012; Wilts et al., 2012b). However, rather different values exist in other  
173 cases, as for instance, the thickness of the lower lamina of *Argyrophorus argenteus* scales is  
174 120 nm (Vukusic et al., 2009), and the Small White (*Pieris rapae*; Fig. 4a of Stavenga et al.,  
175 2004) and the Angled Sunbeam butterfly (*Curetis acuta*; Fig. 4c of Wilts et al., 2013) have  
176 scales where the lower laminae have thicknesses well below 100 nm.

177 We therefore calculated reflectance spectra for five thin films with thicknesses 125-  
178 225 nm (Fig. 4A). The reflectance spectrum for 200 nm (Fig. 4A, blue curve), with maximum  
179 at ~420 nm and minima at ~320 and 620 nm, closely resembles the spectra measured from the  
180 blue wing areas (Fig. 1) except for the latter's non-zero minima, which is most likely due to a  
181 slightly variable thickness of the lower lamina of the blue scales (Fig. 4B). The spectra of  
182 Figure 4 hold for unpigmented scales. The refractive index is modified by high pigment  
183 concentrations (see e.g. Stavenga et al., 2013), and therefore we calculated also the  
184 reflectance spectrum of a 200 nm thick scale containing the pigment measured in the blue  
185 scale of Figure 3B; this yielded a virtually identical spectrum as that for the unpigmented  
186 scale (not shown).

187 The conclusion that thin film reflection determines the colour of the blue scales  
188 suggests that thin film reflection can also contribute to the colour of the other scale types. We  
189 therefore performed a detailed study of the reflection properties of the variously coloured  
190 scales of the nymphalines by inspecting both sides of the scale.

191

### 192 *Spatial and spectral reflection characteristics of single scales*

193 To understand how the local wing colours are created, we investigated the spectral and spatial  
194 reflection characteristics of single scales. We glued single scales to the thin tip of a glass  
195 micropipette and observed the scales at both the abwing (upper) side and adwing (under) side  
196 with an epi-illumination light microscope (Fig. 5, left column). We measured scatterograms of  
197 both scale sides with a narrow aperture white light beam (Fig. 5, middle column), and we also  
198 measured the reflectance spectra with a microspectrophotometer (Fig. 5, right column).

199 A blue scale (from a Peacock's wing eyespot, area #7, Fig. 1B) is blue on both sides  
200 (Fig. 5A, left). The adwing side, which is more or less smooth, creates a much glossier  
201 photograph, than the abwing side, which is highly structured with ridges and crossribs. The  
202 scatterogram of the adwing side is a localized spot (Fig. 5A, middle column, ad). The aperture

203 of the illumination beam was about  $5^\circ$ , but the reflection spot in the scatterogram is slightly  
204 larger, obviously due to the somewhat wrinkled adwing surface. Quite differently, the abwing  
205 scatterogram shows a diffraction pattern, created by the array of parallel ridges, together with  
206 a diffuse pattern, presumably due to scattering by the crossribs (Fig. 5A, middle column, ab;  
207 see also Stavenga et al., 2009).

208 The reflectance spectra of both sides of the blue scale have a very similar shape (Fig.  
209 5A, right) and closely resemble the spectrum calculated for a thin film with slightly varying  
210 thickness and mean thickness 200 nm (Fig. 4B, mean). This suggests that the thin film  
211 properties of the lower lamina of the blue scale dominantly determine the scale colour. The  
212 two reflectance spectra of the blue scale differ in amplitude, which is partly due to the minor  
213 amount of pigment (Fig. 3B), but the main effect must be attributed to the limited aperture of  
214 the objective of the microspectrophotometer, because it captures a much smaller part of the  
215 diffuse abwing reflection than of the directional adwing reflection.

216 An orange scale of the Small Tortoiseshell (from area #3, Fig. 1A) is orange on both  
217 the ab- and adwing side (Fig. 5B, left). Similar to the blue scale, the abwing side has a matte  
218 colour, and the adwing side features a metallic reflection. Also similarly, the adwing  
219 scatterogram reveals a spatially restricted reflection pattern (Fig. 5B, middle), while the  
220 abwing scatterogram shows a bright orange line together with a diffuse background of the  
221 same colour. The adwing reflectance spectrum, which has a distinct trough at  $\sim 460$  nm (Fig.  
222 5B, right), compared with the spectra of Fig. 4A suggests that the lower lamina of the orange  
223 scale acts as a thin film with mean thickness  $\sim 150$  nm. As with the blue scale, with abwing  
224 illumination, the light reflected by the lower lamina's thin film is diffracted by the ridges and  
225 more or less diffusely scattered by the crossribs. The abwing reflectance will be suppressed in  
226 the short wavelength range, where the absorbance of the scale's main pigment, xanthommatin,  
227 is substantial (Fig. 3A,D), thus causing the almost monotonic increase of the reflectance with  
228 increasing wavelength (Fig. 5B, right).

229 A red scale of the Red Admiral (from area #9, Fig. 1C) is very different as the abwing  
230 side is red coloured, while the adwing side is metallic blue (Fig. 5C, left). The abwing  
231 scatterogram features a clear diffraction pattern, perpendicular to the ridge array, together  
232 with a diffuse red background, while the adwing scatterogram shows a local, blue spot,  
233 documenting a very directional, specular reflection pattern (Fig. 5C, middle). The adwing  
234 reflectance spectrum unequivocally indicates a thin film with thickness  $\sim 190$  nm (Fig. 5C,  
235 right). With abwing illumination, the large amount of xanthommatin pigment in the scale will  
236 strongly suppress the blue light reflected by the lower lamina, while leaving the long-



237 wavelength part unimpeded, thus yielding a substantial reflectance only in the red  
238 wavelengths (Fig. 5C, right).

239 An extreme case is a black scale of a Red Admiral, which has a metallic navy-blue  
240 coloured adwing side (Fig. 5D, left). The adwing scatterogram shows a localized spot, as  
241 expected from a directionally reflecting thin film (Fig. 5D, middle). The adwing reflectance  
242 spectrum indicates a thickness of ~200 nm (Fig. 5D, right). The distinct diffraction pattern in  
243 the abwing scatterogram was obtained with a relatively long exposure time, and accordingly  
244 the abwing reflectance was minimal, clearly because the scale's melanin pigment blocked the  
245 reflectance of the lower lamina. Interestingly, multiplying the abwing spectrum by a factor 10  
246 reveals a spectral shape reminiscent of the adwing reflectance spectrum (Fig. 5D, right, dotted  
247 curve). This confirms the interpretation that the lower lamina contributes to the abwing  
248 reflectance spectrum. The highly absorbing melanin suppresses the lower lamina's  
249 contribution, but the upswing in the far-red of the abwing reflectance spectrum can be  
250 immediately understood from the melanin absorbance spectrum, which decreases with  
251 increasing wavelength.

252

### 253 *Scale stacking*

254 Butterfly wing scales are arranged in regular, usually overlapping rows (Fig. 6). In the  
255 eyespots of the dorsal hindwings of the Peacock, blue *cover* scales are backed by black  
256 *ground* scales (Fig. 6A), which thus ensure the blue coloration. When not backed by black  
257 scales, but stacked above one another, the blue scales get a whitish colour (Fig. 6B,C). The  
258 colour change is due to light that has passed one blue scale and is then reflected by the  
259 underlying one. In the case of stacked blue scales, the wing substrate can also contribute to  
260 the reflection (Stavenga et al., 2006), since removal of its scales shows that its reflectance is  
261 certainly not negligible (Fig. 6D). Blue scales above orange-red scales become purplish (Fig.  
262 6C). The tips of the blue scales are curved and thus show a violet colour (Fig. 6A), because of  
263 the basic property of thin films that the reflectance spectrum shifts hypsochromically (towards  
264 shorter wavelengths) when the film plane is tilted (Fig. 6A).

265 Measurements on a bare, descaled area of a Small Tortoiseshell wing (Fig. 6D) show  
266 that the wing substrate has a rather constant reflectance over the whole wavelength range (Fig.  
267 7). The reflectance spectrum features oscillations, indicating that the wing substrate has thin  
268 film properties. From the periodicity of the oscillations a local wing thickness of ~1.1  $\mu\text{m}$  can  
269 be derived (for method, see Stavenga et al., 2011). The transmittance spectrum,  $T(\lambda)$ ,  
270 measured at the same location yields identical oscillations as those seen in the reflectance



271 spectrum,  $R(\lambda)$  (Fig. 7;  $\lambda$  is the wavelength). Combining the reflectance and transmittance  
272 spectra shows that the wing absorptance,  $A(\lambda) = 1 - T(\lambda) - R(\lambda)$  (the area in between  $1 - T(\lambda)$  and  
273  $R(\lambda)$  in Figure 7) is not negligible. Presumably the wing contains traces of 3-OH-kynurenine  
274 and xanthommatin, similar to the yellowish scales (Fig. 3). This may not be surprising, as  
275 during development 3-OH-kynurenine is taken up from the wing haemolymph (inset Fig. 3D;  
276 see Koch, 1991; Reed and Nagy, 2005; Reed et al., 2008).

277

## 278 Discussion

### 279 *Pigments in the wing scales of nymphaline butterflies*

280 The wing scales of nymphaline butterflies are structural as well as pigmentary coloured.  
281 Following previous work on the closely related Map butterfly (*Araschnia levana*; Koch, 1991)  
282 and Painted Lady (*Vanessa cardui*; Reed and Nagy, 2005) we identified as the important  
283 pigments xanthommatin and its precursor 3-OH-kynurenine. However, it is not unlikely that  
284 several ommochromes participate in the wing colouration of nymphaline butterflies. For  
285 instance, dependent on the duration of the rearing conditions, the Buckeye develops either a  
286 pale tan or a dark reddish-brown pigmentation, due to either xanthommatin or dihydro-  
287 xanthommatin and ommatin-D expression (Nijhout, 1997). The different ommochromes have  
288 absorbance spectra peaking all in the blue-green wavelength range (Riou and Christidès,  
289 2010) and thus cannot be easily distinguished by *in situ* measurements. Presumably therefore  
290 the yellow to red scale colours can be finely tuned, not only by mixing 3-OH-kynurenine and  
291 xanthommatin, but also adding other ommochromes. The situation may be even more  
292 complicated, as the absorbance measurements on transparent (blue) as well as ommochrome-  
293 pigmented (coloured) scales suggest that many of those scales contain traces of melanin.

294 A genome-wide survey of genes for enzymes involved in pigment synthesis in the  
295 ascidian *Ciona intestinalis*, a marine invertebrate chordate, demonstrated that the genome  
296 contained a wide set of enzymes involved in the synthesis of melanin, ommochromes,  
297 papiliochromes, pterins as well as hemes (Takeuchi et al., 2005). Whereas pterins are the  
298 wing pigments of pierids, and papiliochromes colour the wings of papilionids, nymphalid  
299 butterflies have clearly favoured ommochromes and melanin for their wing colouration. The  
300 nymphalines have expressed these pigments in rather simply structured scales, in variable  
301 amounts and in different combinations, thus creating complex and striking patterns. Other  
302 nymphalids have diversified scale structures, thus creating much more intense structural  
303 colours. For instance, multilayered ridges cause the bright blue of the wings of *Morpho*

304 species (Kinoshita et al., 2008), and closed windows result in silvery scales in some  
305 heliconiine butterflies (Simonsen, 2007).

306

### 307 *Structural and pigmentary colouration of nymphaline scales*

308 A central finding of the present study is that in all cases the lower lamina acts as a thin film,  
309 as is immediately demonstrated with illumination from the adwing side and diagrammatically  
310 shown in Figure 8A for a red scale of the Red Admiral (Fig. 5C). On the other hand, incident  
311 light at the upper, abwing side partly hits the ridges and crossribs, where it is scattered, but  
312 also enters through the large windows formed by the ridges and crossribs. The light flux  
313 reaching the lower lamina is partly reflected there and subsequently passes the ridges and  
314 crossribs. Pigment present in the scale's components will act as a spectral filter and thus  
315 modify the lower lamina's reflectance spectrum. In a simple interpretation, diagrammatically  
316 shown in Figure 8B for the Red Admiral's red scale, the reflectance spectrum measured with  
317 abwing illumination is the reflectance spectrum of the lower lamina's thin film times the  
318 effective transmittance spectrum of the scale's pigment.

319 The spectral filtering of the thin film reflection is negligible when a scale has no or  
320 little pigment, and then the same reflectance spectrum will be obtained for both ab- and  
321 adwing illumination. This is the case of the blue scales (Fig. 5A). With a high concentration  
322 of melanin, which absorbs throughout the whole visible as well as ultraviolet wavelength  
323 range, abwing reflection is fully suppressed (Fig. 5D). With a considerable concentration of  
324 blue-absorbing xanthommatin, which is the case in the red scales, reflection in the short-  
325 wavelength range is largely suppressed, but the thin film reflection in the red wavelength  
326 range is left unaffected, resulting in a red colour with a slight purplish hue (Fig. 5C).

327 The thickness of the lower lamina of the various scales is not always the same. The  
328 lower laminae of the blue, black and red scales have all a blue-peaking reflectance, indicating  
329 a similar thin film thickness. The orange scales have a very different reflectance spectrum,  
330 however, indicating a much smaller thickness (Fig. 5B). The orange scales contain a modest  
331 amount of xanthommatin as well as some 3-OH-kynurenine, which together suppress the  
332 short-wavelength reflection of the lower lamina, and thus an almost monotonically increasing  
333 reflectance spectrum results (Fig. 5B). The orange colour hence is a combined structural and  
334 pigmentary colouration effect.

335 The reflectance spectrum of the orange scale's thin film suggests that it is tuned to the  
336 absorbance spectrum (or rather the transmittance spectrum) of the scale's pigment. A high  
337 concentration of xanthommatin in a scale with a reflectance spectrum of the lower lamina as

338 that of the blue scale (Fig. 5A) will suppress the blue peak in the scale's (abwing) reflectance  
339 spectrum so that only the reflectance at the red wavelengths remains. This is in fact the case  
340 with the red scales (Fig. 5C). For a yellow or orange scale colour it is essential to shift the thin  
341 film reflectance minimum towards much shorter wavelengths. Pigments absorbing in the short  
342 wavelength range, which act as long-pass spectral filters, can then effectively suppress the  
343 reflection at short wavelengths and leave the long wavelength reflection relatively  
344 unhampered, with as result an enhanced hue of the scale.

345 The survey of the optical properties of the various scales of the nymphalines leads to  
346 an important conclusion, namely that with negligible pigmentation the lower lamina  
347 determines the scale colour, while the pigment becomes a dominant factor at high pigment  
348 concentration, especially in the case of the red and black scales. The general conclusion is that  
349 thin film reflectance and pigment absorbance together determine the scale colour.

350 The importance of the lower lamina's thin film has been previously noticed for the  
351 blue cover scales of *Morpho didius* (Yoshioka and Kinoshita, 2004). However, rather than for  
352 colouring the wings, these scales function as diffusers for the highly reflective, blue ground  
353 scales (Yoshioka and Kinoshita, 2004). Also, the green scales of butterflies of the *Papilio*  
354 *nireus* group have a lower lamina with a blue-reflecting thin film. The crossribs of these  
355 scales form a thick upper lamina, which contains the violet-absorbing pigment papiliochrome  
356 II. The upper lamina acts twice as an effective spectral filter for a broad-band white light  
357 beam, incident from the abwing side, which is reflected by the lower lamina, thus causing a  
358 narrow-band blue-green reflection (Trzeciak et al., 2012; Wilts et al., 2012b).

359

#### 360 *Wing colouration and scale stacking*

361 The reflectance of the scales for about normal illumination is usually rather moderate, of the  
362 order of at most 20%, so that >80% is transmitted. Scales on the wing are stacked, so that a  
363 considerable fraction of the incident light passes the cover scales and reaches the overlapped  
364 ground scales. These scales thus can contribute to the wing reflectance also (Fig. 6). Because  
365 the reflectance of black scales is negligible, blue scales overlapping black ground scales  
366 create a blue wing colour, but blue scales on top of each other yield a desaturated bluish  
367 colour. When the wing substrate also contributes, the result is a whitish colour. The  
368 reflectance spectra of the whitish areas nevertheless have peaks in the blue wavelength range  
369 (Fig. 1G,H, #10, 14), betraying the presence of blue-reflecting thin films. Similarly, a red  
370 scale on top of another red scale and/or the wing substrate will result in a more saturated red  
371 colour, due to the enhanced reflectance in the longer wavelength range. This is the case for

372 the Peacock wing areas with densely packed red scales (Fig. 1B, 6C). The consequences of  
373 wing scale stacking are diagrammatically shown in Figure 8C,D (see also Supplementary  
374 Figure S2).

375         Wing scale stacking appears to be an effective method to achieve bright colouration.  
376 Already at the level of a single scale, the ~200 nm thick lower lamina is an extremely  
377 lightweight, reasonably effective reflector. Its reflectivity is highly directional, and  
378 presumably therefore the upper lamina, consisting of ridges and crossribs, acts as a diffuser.  
379 When pigmented, the upper lamina additionally acts as a spectral filter. In other words, the  
380 asymmetrical anatomy of butterfly scales, with the well-reflecting lower lamina and the  
381 diffusive upper lamina may in fact have a straightforward functional basis. Furthermore, the  
382 reflectance of a single scale may be moderate; by stacking a few scales, the additive effect  
383 yields quite appreciable reflectance values (Fig. 1).

384

#### 385 *Wing colouration and display*

386 A special point to consider is the prominent red colouration of the studied nymphaline  
387 butterflies. Three different visual pigments have been characterized in nymphalines;  
388 ultraviolet-, blue- and green-absorbing rhodopsins (Briscoe and Bernard, 2005). The longest-  
389 wavelength receptor identified has a peak wavelength around 530 nm, meaning a very limited  
390 overlap of the receptor's spectral sensitivity and the red reflectance spectra of the wing (see  
391 also Kinoshita et al., 1997). The red wing parts hence may not be bright signalers for  
392 conspecific butterflies, but rather for predatory birds, which have photoreceptors that are  
393 highly sensitive in the red (e.g. Hart, 2001). Whereas in the case of the Peacock, the red  
394 colouration may add to the warning signal of the wings' eyespots (Blest, 1957), it is hard to  
395 conceive that a similar mimicry or threatening display is realized in the wings of the Small  
396 Tortoiseshell and the Red Admiral. Possibly, their wing patterns have a visually disruptive  
397 function.

398

#### 399 *Conclusion*

400 A few levels of complexity determine the colouration of nymphaline wings. The lower lamina  
401 of the scales acts as a thin film reflector. Blue scales are virtually unpigmented and have a  
402 diffuse colour due to the light-scattering ridges and cross-ribs. When the scales are pigmented,  
403 however, spectrally selective absorption by the pigment of the light reflected by the lower  
404 lamina determines the scale colour. The local scale stacking as well as the reflecting wing  
405 substrate fine tune the wing colour.

406

407 **Materials and Methods**408 *Animals*

409 Specimens of the Small Tortoiseshell (*Aglais urticae*), the Peacock (*Aglais io*; previously  
410 *Inachis io*), and the Red Admiral (*Vanessa atalanta*), which are among the most common  
411 nymphalid butterflies in the Northern part of the Netherlands, were captured locally in the  
412 summer of 2013.

413

414 *Photography*

415 Photographs of the tapestry of scales of different wing parts (Fig. 6) were made with an  
416 Olympus SZX16 stereomicroscope equipped with an Olympus DP70 digital camera  
417 (Olympus, Tokyo, Japan). Photographs of both the adwing (lower) side and abwing (upper)  
418 side of single scales, obtained by gently pressing the wings on to a microscope slide and  
419 subsequently gluing the individual scales to a glass micropipette (Fig. 5), were made with a  
420 Zeiss Universal Microscope, using epi-illumination through a Zeiss Epiplan 16x/0.35  
421 objective (Zeiss, Oberkochen, Germany). Photographs of single scales in immersion fluid  
422 (refractive index 1.60; Fig. 2) were made with a Nikon Fluor 40x/1.30 oil objective (Nikon,  
423 Tokyo, Japan). The digital camera was a Kappa DX-40 (Kappa Optronics GmbH, Gleichen,  
424 Germany).

425

426 *Spectroscopy*

427 Reflectance spectra of different wing areas (Fig. 1) were measured with a bifurcated probe  
428 (Avantes FCR-7UV200; Avantes, Eerbeek, Netherlands), using an AvaSpec 2048-2 CCD  
429 detector array spectrometer (Avantes, Eerbeek, Netherlands). The light source was a  
430 deuterium-halogen lamp (AvaLight-D(H)-S), and the reference was a white diffuse  
431 reflectance tile (Avantes WS-2). The bifurcated probe illuminated an area with a diameter of  
432 about 1 mm, and captured the light reflected in a small spatial angle, aperture about 20°.  
433 Reflectance spectra of both sides of single scales attached to a glass micropipette (Fig. 5) and  
434 of bare, descaled wing areas (Fig. 7) were measured with a microspectrophotometer (MSP),  
435 being a Leitz Ortholux microscope (Leitz, Wetzlar, Germany) connected to the detector array  
436 spectrometer, with a xenon arc light source. Absorbance spectra of single scales, immersed in  
437 immersion oil (refractive index 1.515), were also measured with the MSP. We used  
438 immersion oil instead of fluids with higher refractive indices, because of the refractive index  
439 fluids' high absorption in the UV. The area measured with the MSP was about square with

440 sides typically  $\sim 15 \mu\text{m}$ . The microscope objective was an Olympus LUCPlanFL N 20x/0.45  
441 (Olympus, Tokyo, Japan). Due to the glass optics, the MSP spectra were limited to  
442 wavelengths  $>350 \text{ nm}$ . For the reflectance measurements with the MSP, the white diffuse  
443 reflectance tile was also used as a reference, but this causes severely overestimated  
444 reflectance values when the measured object is not diffuse but directionally reflecting. We  
445 estimated, by comparing the diffuse reflectance tile with a mirror, that the reflectance of  
446 specular reflecting objects (e.g. the adwing sides of the scales and the wing substrate) is about  
447 a factor 5, and therefore we divided the measured reflectance spectra in Figures 5 and 7 by  
448 that factor. We have to note however that this will inevitably cause artificially low values for  
449 the spectra of the abwing sides of the scales, which are more or less diffusely reflecting  
450 objects.

451

#### 452 *Scanning Electron Microscopy (SEM)*

453 The scale anatomy was visualized by scanning electron microscopy (Philips XL-30 ESEM;  
454 Philips, Eindhoven, Netherlands). Prior to imaging, the samples were sputtered with  
455 palladium.

456

#### 457 *Imaging scatterometry*

458 For investigating the spatial reflection characteristics of the wing scales, we performed  
459 imaging scatterometry (Stavenga et al., 2009; Wilts et al., 2009). An isolated, single scale  
460 (Fig. 5; or a wing patch: Supplementary Material, Fig. S2) attached to a glass micropipette  
461 was positioned at the first focal point of the ellipsoidal mirror of the imaging scatterometer.  
462 The scatterograms were obtained by focusing a white light beam with a narrow aperture ( $< 5^\circ$ )  
463 onto a small circular area (diameter  $\sim 13 \mu\text{m}$ ) of the isolated scale (or a scale of the wing  
464 patch), and the spatial distribution of the far-field scattered light was then monitored. A flake  
465 of magnesium oxide served as a white diffuse reference object (for further details, see  
466 Stavenga et al., 2009; Wilts et al., 2009).

467

#### 468 **Acknowledgments**

469 We thank Aidan Vey and Helen Ghiradella for reading the manuscript.

470

#### 471 **Competing Interests**

472 No competing interests declared.

473



474 **Funding**

475 This study was financially supported by the Air Force Office of Scientific Research/European  
476 Office of Aerospace Research and Development AFOSR/EOARD (grant FA8655-08-1-3012).

477

478 **References**

- 479 **Barbier, M.** (1981). The status of blue-green bile pigments of butterflies, and their  
480 phototransformations. *Experientia* **37**, 1060-1062.
- 481 **Blest, A. D.** (1957). The function of eyespot patterns in the Lepidoptera. *Behaviour* **11**, 209-  
482 256.
- 483 **Briscoe, A. D. and Bernard, G. D.** (2005). Eyeshine and spectral tuning of long wavelength-  
484 sensitive rhodopsins: no evidence for red-sensitive photoreceptors among five  
485 Nymphalini butterfly species. *J. Exp. Biol.* **208**, 687-696.
- 486 **Ghiradella, H.** (1989). Structure and development of iridescent butterfly scales: lattices and  
487 laminae. *J. Morphol.* **202**, 69-88.
- 488 **Ghiradella, H.** (1998). Hairs, bristles, and scales. In *Microscopic anatomy of invertebrates,*  
489 *Vol 11A: Insecta* (ed. M. Locke), pp. 257-287. New York: Wiley-Liss.
- 490 **Ghiradella, H.** (2010). Insect cuticular surface modifications: scales and other structural  
491 formations. *Adv. Insect Physiol.* **38**, 135-180.
- 492 **Ghiradella, H., Aneshansley, D., Eisner, T., Silberglied, R. and Hinton, H. E.** (1972).  
493 Ultraviolet reflection of a male butterfly: Interference color caused by thin-layer  
494 elaboration of wing scales. *Science* **178**, 1214-1217.
- 495 **Hart, N. S.** (2001). The visual ecology of avian photoreceptors. *Prog. Retin. Eye Res.* **20**,  
496 675-703.
- 497 **Kayser, H.** (1985). Pigments. In *Comprehensive insect physiology, biochemistry and*  
498 *pharmacology* (eds. G.A. Kerkut and L.I. Gilbert), Vol. **10**, pp. 367-415. Oxford:  
499 Pergamon Press.
- 500 **Kinoshita, S. and Yoshioka, S.** (2005). Structural colors in nature: the role of regularity and  
501 irregularity in the structure. *ChemPhysChem* **6**, 1-19.
- 502 **Kinoshita, M., Sato, M. and Arikawa, K.** (1997). Spectral receptors of nymphalid  
503 butterflies. *Naturwissenschaften* **84**, 199-201.
- 504 **Kinoshita, S., Yoshioka, S., Fujii, Y. and Osanai, M.** (2002). Photophysics of structural  
505 color in the *Morpho* butterflies. *Forma* **17**, 103-121.
- 506 **Kinoshita, S., Yoshioka, S. and Miyazaki, J.** (2008). Physics of structural colors. *Rep. Prog.*  
507 *Phys.* **71**, 076401.

- 508 **Koch, P. B.** (1991) Precursors of pattern specific ommatin in red wing scales of the  
 509 polyphenic butterfly *Araschnia levana* L.: Haemolymph tryptophan and 3-  
 510 hydroxykynurenine. *Insect Biochem.* **21**, 785-794.
- 511 **Leertouwer, H. L., Wilts, B. D. and Stavenga, D. G.** (2011). Refractive index and  
 512 dispersion of butterfly scale chitin and bird feather keratin measured by interference  
 513 microscopy. *Opt. Express* **19**, 24061-24066.
- 514 **Michielsen, K. and Stavenga, D. G.** (2008). Gyroid cuticular structures in butterfly wing  
 515 scales: biological photonic crystals. *J. R. Soc. Interface* **5**, 85-94.
- 516 **Michielsen, K., DeRaedt, H. and Stavenga, D. G.** (2010). Reflectivity of the gyroid  
 517 biophotonic crystals in the ventral wing scales of the Green Hairstreak butterfly,  
 518 *Callophrys rubi*. *J. R. Soc. Interface* **7**, 765-771.
- 519 **Nijhout, H. F.** (1991). *The development and evolution of butterfly wing patterns*.  
 520 Washington: Smithsonian Institution Press.
- 521 **Nijhout, H. F.** (1997). Ommochrome pigmentation of the *linea* and *rosa* seasonal forms of  
 522 *Precis coenia* (Lepidoptera: Nymphalidae). *Arch. Insect Biochem. Physiol.* **36**, 215-  
 523 222.
- 524 **Nijhout, H. F.** (2010). Molecular and physiological basis of colour pattern formation. *Adv.*  
 525 *Insect Physiol.* **38**, 219-265.
- 526 **Reed, R. D. and Nagy, L. M.** (2005). Evolutionary redeployment of a biosynthetic module:  
 527 expression of eye pigment genes vermilion, cinnabar, and white in butterfly wing  
 528 development. *Evol. Dev.* **7**, 301-311.
- 529 **Reed, R. D., McMillan, W. O. and Nagy, L. M.** (2008). Gene expression underlying  
 530 adaptive variation in *Heliconius* wing patterns: non-modular regulation of overlapping  
 531 cinnabar and vermilion prepatterns. *Proc. R. Soc. B* **275**, 37-45.
- 532 **Riou, M. and Christidès, J.** (2010). Cryptic color change in a crab spider (*Misumena vatia*):  
 533 identification and quantification of precursors and ommochrome pigments by HPLC.  
 534 *J. Chem. Ecol.* **36**, 412-423.
- 535 **Rutowski, R.L., Macedonia, J.M., Morehouse, N. and Taylor-Taft, L.** (2005) Pterin  
 536 pigments amplify iridescent ultraviolet signal in males of the orange sulphur butterfly,  
 537 *Colias eurytheme*. *Proc. R. Soc. B* **272**, 2329-2335.
- 538 **Saranathan, V., Osuji, C. O., Mochrie, S. G., Noh, H., Narayanan, S., Sandy, A.,**  
 539 **Dufresne, E. R. and Prum, R. O.** (2010). Structure, function, and self-assembly of  
 540 single network gyroid (I4132) photonic crystals in butterfly wing scales. *Proc. Nat.*  
 541 *Acad. Sci. USA* **107**, 11676-11681.

- 542 **Simonsen, T. J.** (2007). Comparative morphology and evolutionary aspects of the reflective  
543 under wing scale-pattern in Fritillary butterflies (Nymphalidae: Argynnini). *Zool.*  
544 *Anzeig. A* **246**, 1-10.
- 545 **Srinivasarao, M.** (1999). Nano-optics in the biological world: Beetles, butterflies, birds and  
546 moths. *Chem. Rev.* **99**, 1935-1961.
- 547 **Stavenga, D. G., Giraldo, M. A. and Hoenders, B. J.** (2006). Reflectance and transmittance  
548 of light scattering scales stacked on the wings of pierid butterflies. *Opt. Express* **14**,  
549 4880-4890.
- 550 **Stavenga, D. G., Giraldo, M. and Leertouwer, H. L.** (2010). Butterfly wing colors: glass  
551 scales of *Graphium sarpedon* cause polarized iridescence and enhance blue/green  
552 pigment coloration of the wing membrane. *J. Exp. Biol.* **213**, 1731-1739.
- 553 **Stavenga, D. G., Leertouwer, H. L., Pirih, P. and Wehling, M. F.** (2009). Imaging  
554 scatterometry of butterfly wing scales. *Opt. Express* **17**, 193-202.
- 555 **Stavenga, D. G., Leertouwer, H. L. and Wilts, B. D.** (2013). Quantifying the refractive  
556 index dispersion of a pigmented biological tissue using Jamin–Lebedeff interference  
557 microscopy. *Light: Sci. Appl.* **2**, e100.
- 558 **Stavenga, D. G., Mashushita, A., Arikawa, K., Leertouwer, H. L. and Wilts, B. D.** (2012).  
559 Glass scales on the wing of the swordtail butterfly *Graphium sarpedon* act as thin film  
560 polarizing reflectors. *J. Exp. Biol.* **215**, 657-662.
- 561 **Stavenga, D. G., Stowe, S., Siebke, K., Zeil, J. and Arikawa, K.** (2004). Butterfly wing  
562 colours: scale beads make white pierid wings brighter. *Proc. R. Soc. Lond. B* **271**,  
563 1577-1584.
- 564 **Stavenga, D. G., Tinbergen, J., Leertouwer, H. L. and Wilts, B. D.** (2011). Kingfisher  
565 feathers - colouration by pigments, spongy nanostructures and thin films. *J. Exp. Biol.*  
566 **214**, 3960-3967.
- 567 **Takeuchi, K., Satou, Y., Yamamoto, H. and Satoh, N.** (2005). A genome-wide survey of  
568 genes for enzymes involved in pigment synthesis in an ascidian, *Ciona intestinalis*.  
569 *Zool. Sci.* **22**, 723-734.
- 570 **Trzeciak, T.M., Wilts, B.D., Stavenga, D.G. and Vukusic, P.** (2012) Variable multilayer  
571 reflection together with long-pass filtering pigment determines the wing coloration of  
572 papilionid butterflies of the nireus group. *Opt. Express* **20**, 8877-8890.
- 573 **Umebachi, Y.** (1985). Papiliochrome, a new pigment group of butterfly. *Zool. Sci.* **2**, 163-  
574 174.

- 575 **Vukusic, P., Sambles, J. R., Lawrence, C. R. and Wootton, R. J.** (1999). Quantified  
576 interference and diffraction in single *Morpho* butterfly scales. *Proc. R. Soc. B* **266**,  
577 1403-1411.
- 578 **Vukusic, P., Kelly, R. and Hooper, I.** (2009). A biological sub-micron thickness optical  
579 broadband reflector characterized using both light and microwaves. *J. R. Soc.*  
580 *Interface* **6**, S193-S201.
- 581 **Wijnen, B., Leertouwer, H. L. and Stavenga, D. G.** (2007). Colors and pterin pigmentation  
582 of pierid butterfly wings. *J. Insect Physiol.* **53**, 1206-1217.
- 583 **Wilts, B. D., Leertouwer, H. L. and Stavenga, D. G.** (2009). Imaging scatterometry and  
584 microspectrophotometry of lycaenid butterfly wing scales with perforated multilayers.  
585 *J. R. Soc. Interface* **6**, S185-S192.
- 586 **Wilts, B. D., Michielsen, K., De Raedt, H. and Stavenga, D. G.** (2012a). Iridescence and  
587 spectral filtering of the gyroid-type photonic crystals in *Parides sesostris* wing scales.  
588 *Interface Focus* **2**, 681-687.
- 589 **Wilts, B. D., Trzeciak, T. M., Vukusic, P. and Stavenga, D. G.** (2012b). Papiliochrome II  
590 pigment reduces the angle dependency of structural wing colouration in *nireus* group  
591 papilionids. *J. Exp. Biol.* **215**, 796-805.
- 592 **Wilts, B. D., Pirih, P., Arikawa, K. and Stavenga, D. G.** (2013). Shiny wing scales cause  
593 spec(tac)ular camouflage of the angled sunbeam butterfly, *Curetis acuta*. *Biol. J. Linn.*  
594 *Soc.* **109**, 279-289.
- 595 **Yagi, N.** (1954). Note of electron microscope research on pterin pigment in the scales of  
596 pierid butterflies. *Annot. Zool. Jap.* **27**, 113-114.
- 597 **Yeh, P.** (2005). *Optical waves in layered media*. Hoboken NJ: Wiley-Interscience.
- 598 **Yoshioka, S. and Kinoshita, S.** (2004). Wavelength-selective and anisotropic light-diffusing  
599 scale on the wing of the *Morpho* butterfly. *Proc. R. Soc. B* **271**, 581-587.

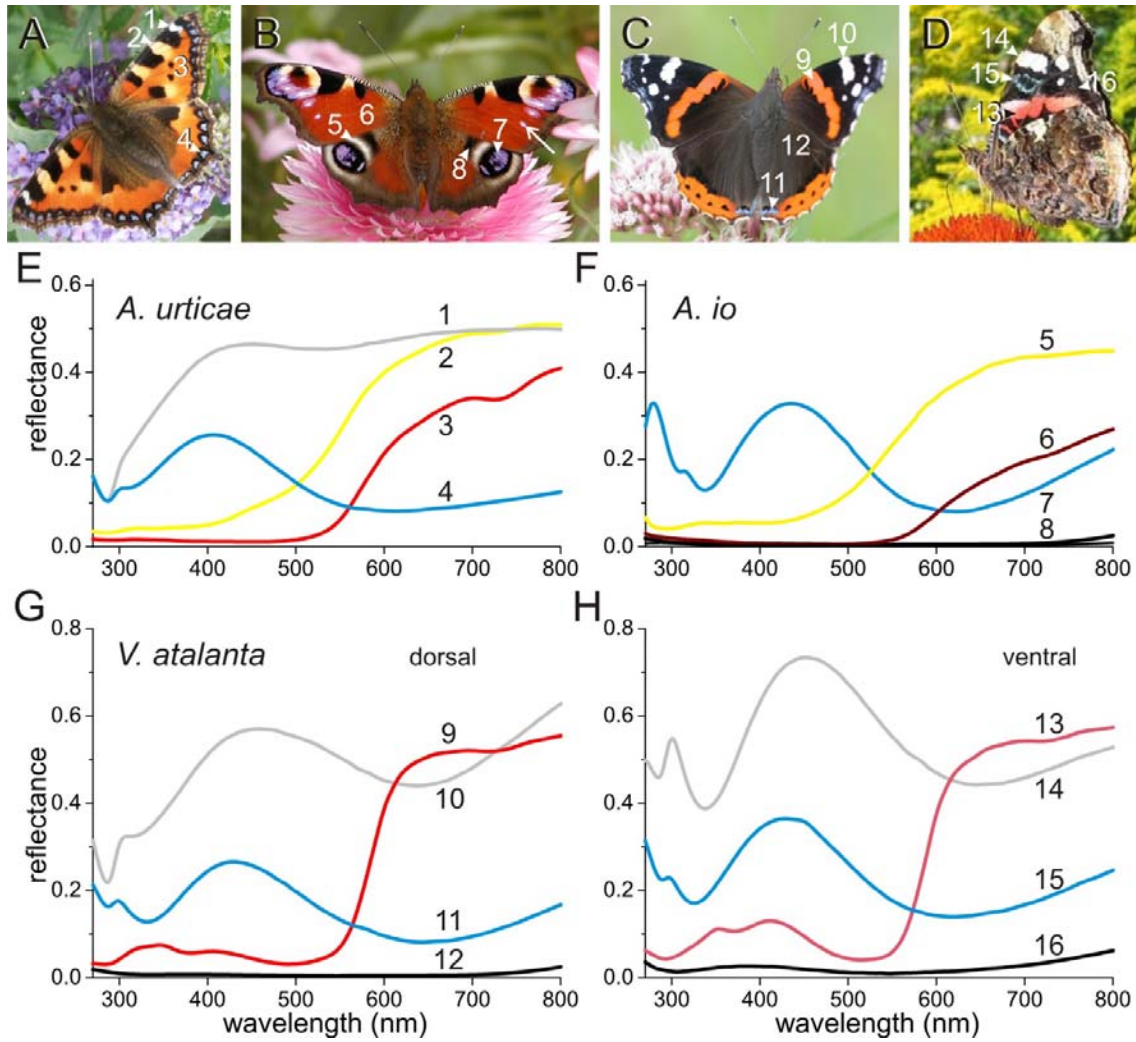

600  
601  
602  
603  
604  
605  
606  
607

Fig. 1. Three common nymphaline butterflies and wing reflectance spectra measured with a bifurcated probe. **A, E** *Aglais urticae*, the Small Tortoiseshell. **B, F** *Aglais io*, the Peacock. **C, G** *Vanessa atalanta*, the Red Admiral, wing dorsal surfaces. **D, H** *V. atalanta*, wing ventral surfaces. The numbers in the photographs and spectra correspond. The arrow in **B** corresponds to Fig. 6C.



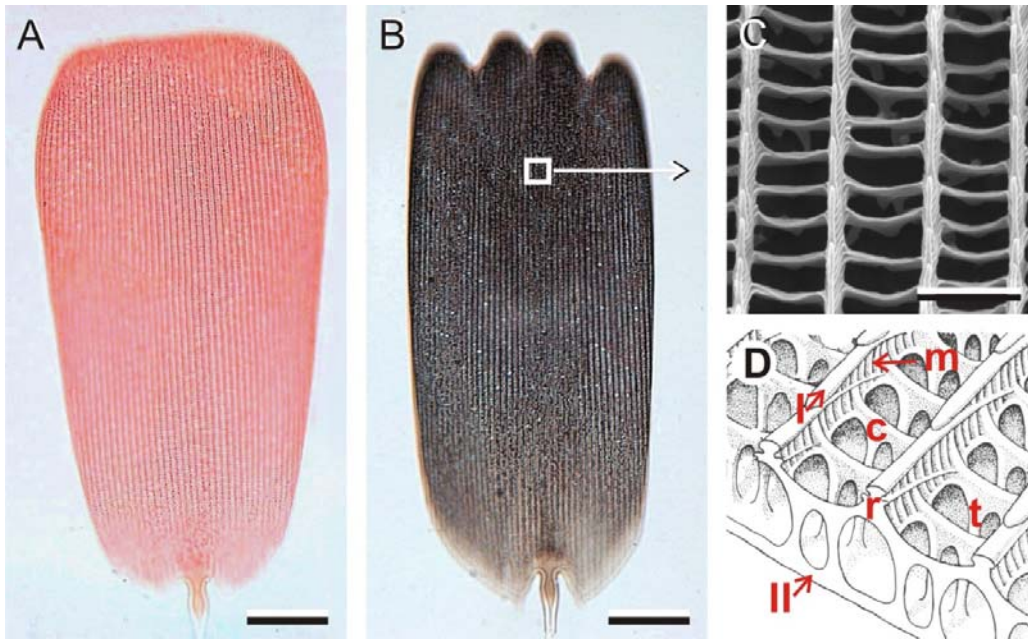

608

609

610 Fig. 2. Anatomy of nymphaline wing scales. **A, B** Transmitted light microscopy of a red scale  
 611 of a Red Admiral and a black scale of a Peacock immersed in a refractive index fluid (bars: 20  
 612  $\mu\text{m}$ ). **C** Scanning electron microscopy photograph of a black scale of a Peacock (bar: 2  $\mu\text{m}$ );  
 613 the size of **C** corresponds to the square in **B**. **D** Drawing of a nymphaline wing scale  
 614 (modified from Ghiradella, 1998), showing the ridges (r) with lamellae (l) and microribs (m),  
 615 some of which are continuous with the crossribs (c), which are connected by trabeculae (t) to  
 616 the lower lamina (ll) of the scale.

617



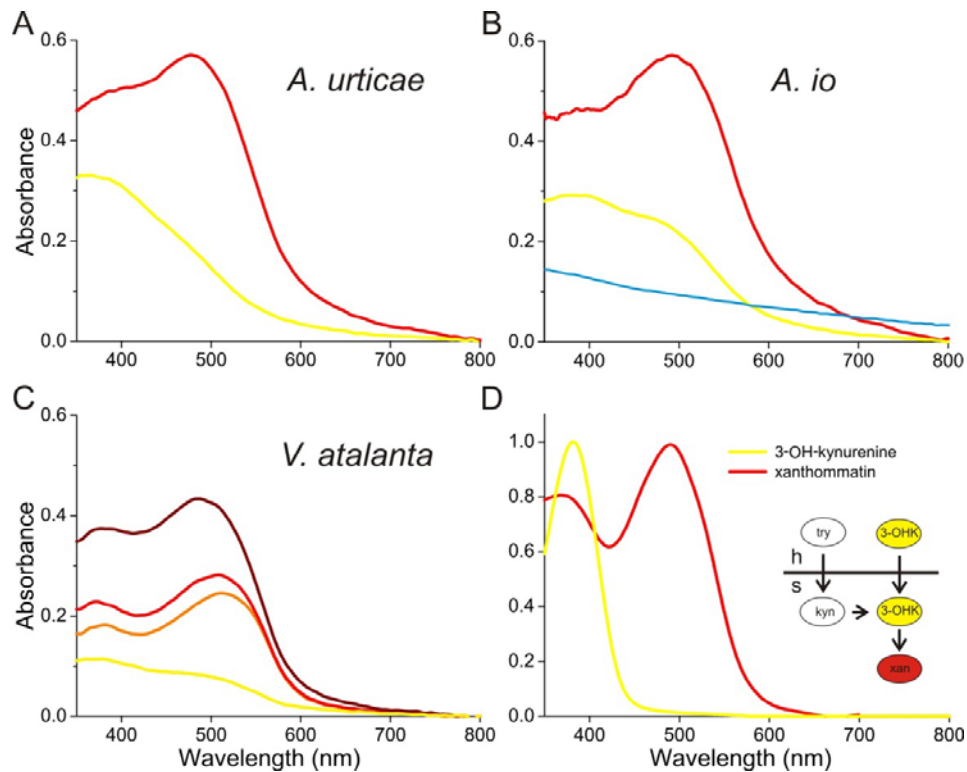

618

619

620 Fig. 3. Absorbance spectra of isolated yellow to red-brown wing scales in immersion oil  
 621 (refractive index  $n = 1.515$ ) and pigments. **A** Small Tortoiseshell. The red and yellow curves  
 622 are from scales in areas #3 and 2, respectively, of Fig. 1A. **B** Peacock. The red curve  
 623 corresponds to area #6 of Fig. 1B, and the yellow curve holds for scales from a small  
 624 yellowish area on the ventral wing surface. The blue curve is the average absorbance  
 625 spectrum of blue scales from the eyespot of the dorsal hindwing (Fig. 1B, area #7), showing  
 626 some melanin pigmentation. **C** Red Admiral. The brown and red curves are for scales from  
 627 the orange-red band on the dorsal forewing (Fig. 1C, area #9), and the orange curve is for  
 628 scales from the orange-red band at the ventral forewing (Fig. 1D, area #13); the yellow curve  
 629 is from a small yellow area in the ventral forewing. **D** Normalised absorbance spectra of the  
 630 pigments 3-hydroxy-kynurenine, extracted from yellow scales of *Heliconius melpomene* with  
 631 methanol (unpublished; see also Reed and Nagy, 2005) and xanthommatin (from Nijhout,  
 632 1997). Inset: hypothetical model of ommochrome synthesis in butterfly wing scales based on  
 633 analyses of *Drosophila* colour mutants. The ommochrome precursor tryptophan (try) is  
 634 thought to be transported from the haemolymph (h) into a scale (s) cell, where it is processed  
 635 by several enzymes including *vermillion* to kynurenine (kyn) and *cinnabar* into 3-hydroxy-  
 636 kynurenine (3-OHK), which is processed further into xanthommatin (xan). 3-OHK itself can  
 637 be taken up directly into scales (after Reed and Nagy, 2005; Reed et al., 2008).

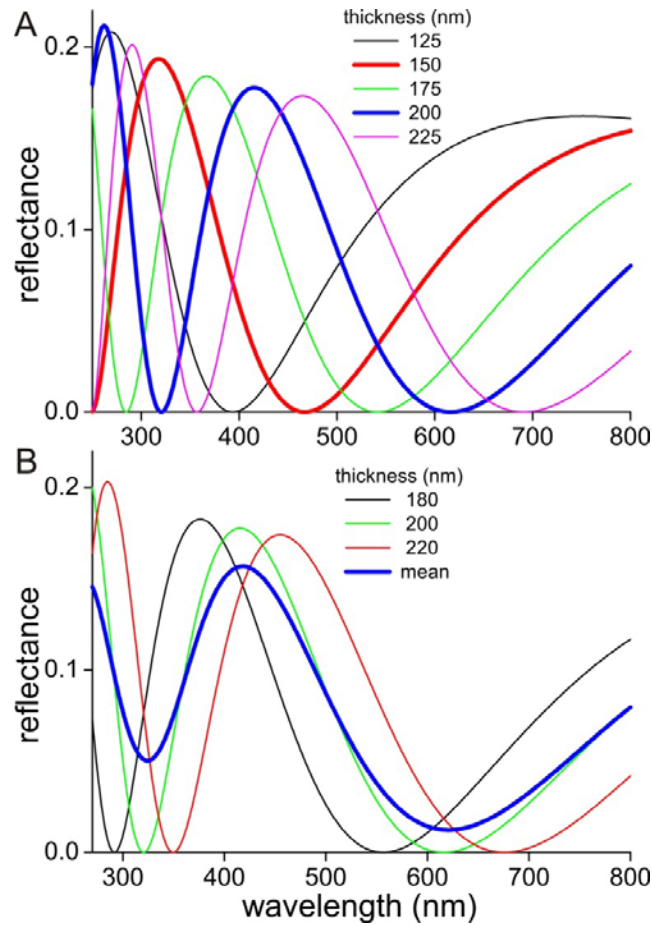

638

639 Fig. 4. Reflectance spectra of cuticle thin films in air. **A.** Reflectance spectra of thin films  
 640 with thicknesses 125 to 225 nm and the refractive index of butterfly wing scales (Leertouwer  
 641 et al. 2011). **B** Reflectance spectra of thin films with thicknesses 180, 200 and 220 nm and  
 642 their mean.

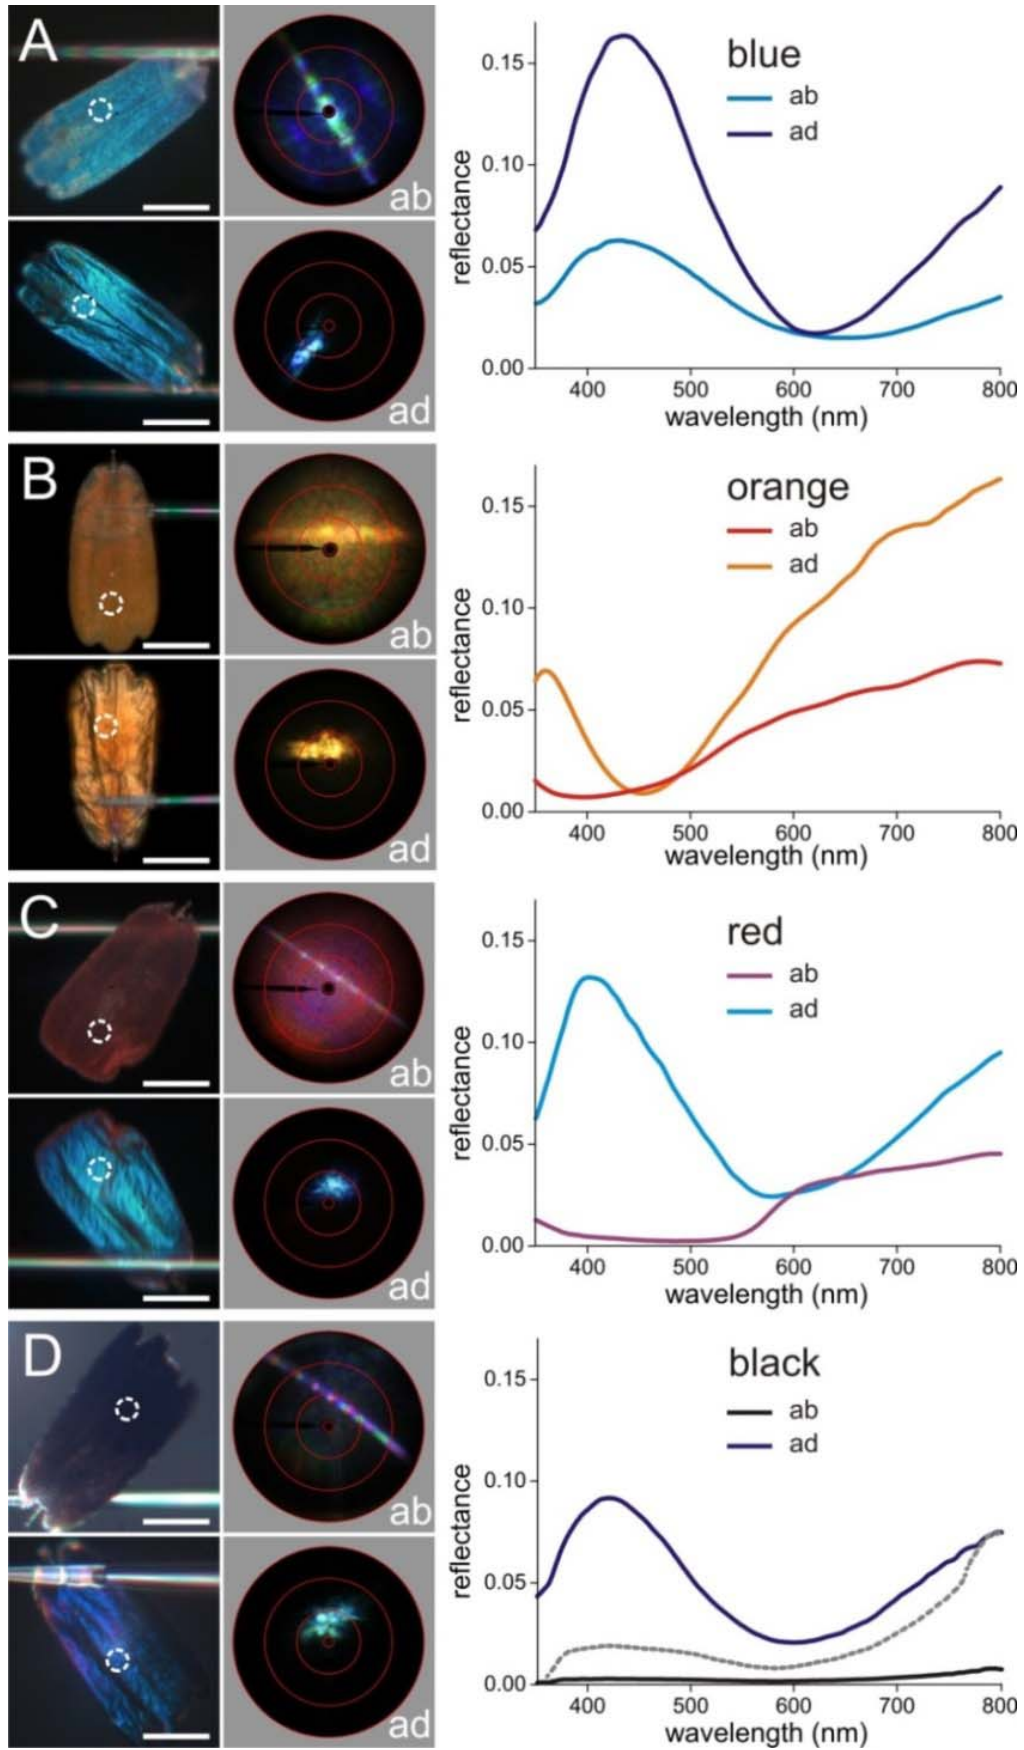

644 Fig. 5. Reflection properties of single nymphaline wing scales. Left-hand column:  
645 photographs of abwing (top) and adwing (bottom) sides of a blue scale of a Peacock (**A**), an  
646 orange scale of a Small Tortoiseshell (**B**), a red scale of a Red Admiral (**C**), and a black scale  
647 of a Red Admiral (**D**); scale bars: 50  $\mu\text{m}$ . The wing scales are glued to a glass micropipette  
648 (shiny and/or coloured horizontal bars). Middle column: scatterograms of the four scales,  
649 obtained by illuminating a small area in the ab- and adwing sides (dashed circles in the  
650 photographs of the left column) with a narrow aperture light beam. The red circles indicate  
651 scattering angles of 5°, 30°, 60°, and 90° (see Fig. S1). Right-hand column: reflectance spectra  
652 measured from a small area (similar to the dashed circle in the photographs of the left-hand  
653 column. The dotted line in **D** (right) is the black scale's abwing reflectance spectrum times 10.

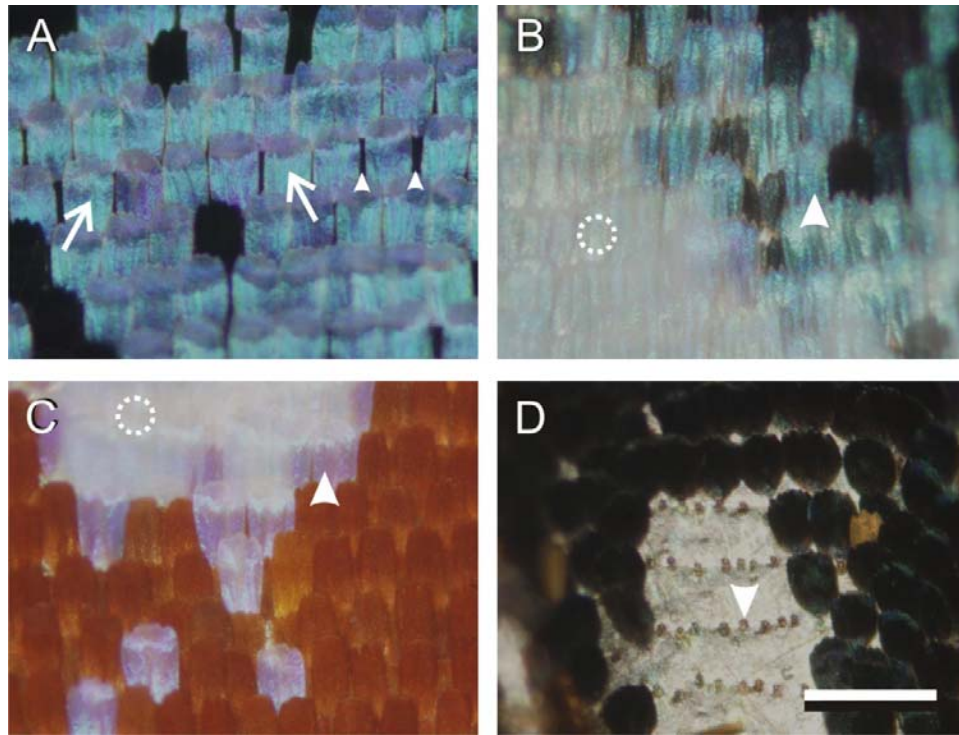

654

655

656 Fig. 6. Packing and stacking of scales on nymphaline butterfly wings. **A** Blue scales in the  
 657 eyespot of a dorsal hindwing of a Peacock butterfly (Fig. 1B, area #7). Below the blue cover  
 658 scales (arrows) and some black cover scales there exist black ground scales (small  
 659 arrowheads). The tips of the blue scales are curved and thus show a violet colour (see text). **B**  
 660 Border area of the white band on the ventral forewing of a Red Admiral butterfly (Fig. 1D,  
 661 area #14). Stacked unpigmented cover scales and ground scales yield together with the wing  
 662 substrate a white colour (area with dotted white circle), but unpigmented cover scales above  
 663 black ground scales appear blue (arrowhead). **C** Border of the white spot in the dorsal  
 664 forewing of a Peacock (indicated by the arrow in Fig. 1B). Stacked unpigmented cover scales,  
 665 ground scales and wing membrane yield white (area with dotted white circle), but  
 666 unpigmented cover scales above orange ground scales appear pink (arrowhead). **D** Damaged  
 667 area with black scales on the dorsal forewing of a Small Tortoiseshell, showing the bare wing  
 668 substrate with the sockets of the removed scales (arrowhead). Bar for **A-D**: 200  $\mu$ m.

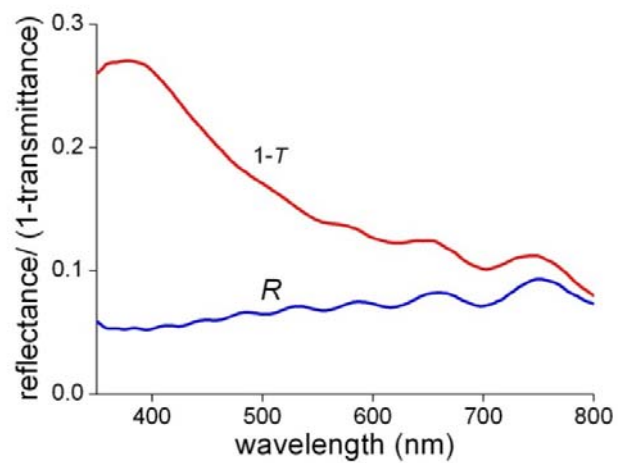

669

670 Fig. 7. Thin film properties of the clear wing of a Small Tortoiseshell. The absorptance

671  $A = 1 - T - R$  indicates that the wing contains 3-OH-kynurenine as well as xanthommatin.



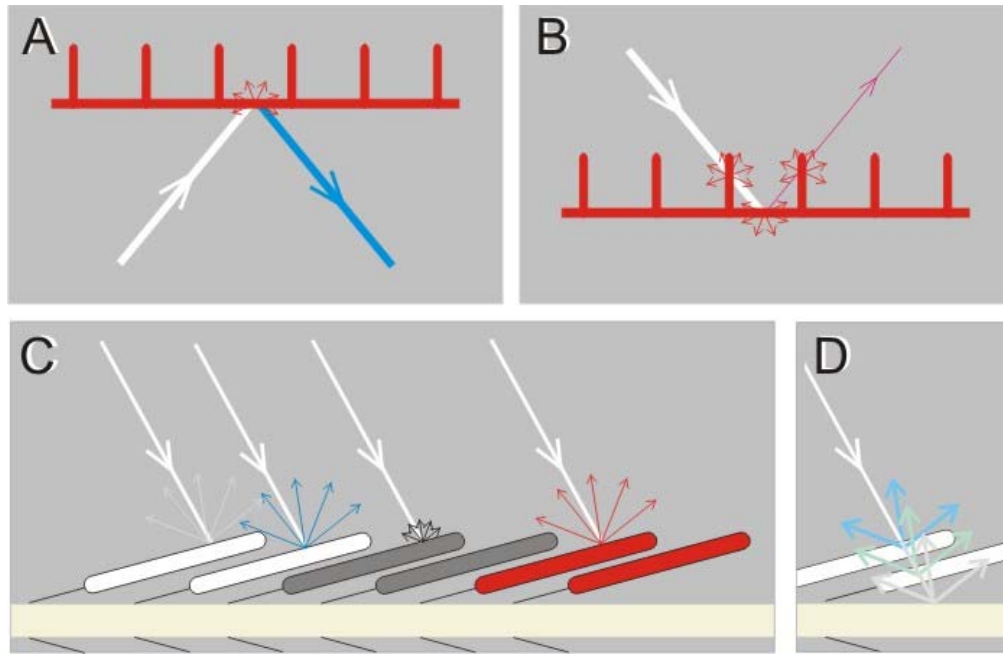

672

673

674 Fig. 8. Diagrams of light reflection and scattering by the wing scales of nymphaline  
 675 butterflies. **A** Light reflection of a red pigmented scale illuminated at the adwing side is  
 676 dominated by the thin film properties of the lower lamina, yielding a blue directional  
 677 reflection. **B** Light reflection of a red pigmented scale illuminated at the abwing side is  
 678 dominated by scattering at the ridges and cross-ribs, thus causing considerable absorption by  
 679 the pigment in the scale. **C** Illumination of the scales on the wing results in colouration  
 680 depending on the local stacking of the scales. An unpigmented scale on top of another  
 681 unpigmented scale yields a white-bluish colour. An unpigmented scale on top of a melanin-  
 682 pigmented, black scale yields a blue colour. A melanin-pigmented scale is black due to its low  
 683 reflectance. A red-pigmented scale reflects and back-scatters red light, which becomes more  
 684 saturated with stacked red scales. **D** Detail of **C** to illustrate that the observed scale colour is  
 685 the cumulative result of reflection and scattering by the stack of scales and the wing substrate.
